# Supplementary material for: Surveillance for Enteroviruses Associated with Hand, Foot, and Mouth Disease, and Other Mucocutaneous Symptoms in Spain, 2006–2020
Source: MDPI journal article supplement (doi:10.3390/v13050781), 2021-04-28
Supplement: s1 [file s1]

Table S1. CVA6 sequences included in the phylogenetic analysis and obtained from GenBank

| Strain                  | Country | Date | GenBank accession no. |
|-------------------------|---------|------|-----------------------|
| CV-A6-GDULA(RC)         | USA     | 1949 | AY421764              |
| JQ364866/CHN/1992       | CHN     | 1992 | JQ364886              |
| JQ364887/CHN/1996       | CHN     | 1996 | JQ364887              |
| 354/CA6/Shiga/1999      | JPN     | 1999 | AB114114              |
| P-536/CA6/Kanagawa/2000 | JPN     | 2000 | AB114099              |
| NOR02-319/2             | NOR     | 2002 | DQ317276              |
| NOR03-1014              | NOR     | 2003 | DQ317282              |
| KOR03 DK3-102           | KOR     | 2003 | AY748797              |
| TW 2004-02892           | TW      | 2004 | EU908165              |
| Fukuoka City2005-85     | JPN     | 2005 | AB234336              |
| Fukuoka City2005-86     | JPN     | 2005 | AB234337              |
| Fukuoka City2005-87     | JPN     | 2005 | AB234338              |
| TW 2005-07594           | TW      | 2005 | EU908169              |
| LC421554/JPN/2006       | JPN     | 2006 | LC421554              |
| TW 2006-03257           | TW      | 2006 | EU908148              |
| JN203517/IND            | IND     | 2007 | JN203517              |
| GRC 48.07/2007          | GRC     | 2007 | FM878831              |
| TW 2007-00720           | TW      | 2007 | EU908152              |
| FR797988/ESP/2008       | SP      | 2008 | FR797988              |
| LC421627/JPN/2008       | JPN     | 2008 | LC421627              |
| FIN08/So2413            | FIN     | 2008 | GU248481              |
| FIN08/We2417            | FIN     | 2008 | GU248480              |
| FIN08/No2426            | FIN     | 2008 | GU248482              |
| FIN08/We2419            | FIN     | 2008 | GU248483              |
| FR797987/SP/2008        | SP      | 2008 | FR797987              |
| ESP08/54594             | SP      | 2008 | FR796477              |
| ESP08/1215              | SP      | 2008 | FR797986              |
| ESP08/1023              | SP      | 2008 | FR797984              |
| IND 0913543-09          | IND     | 2009 | HM190277              |
| IND 099151-09           | IND     | 2009 | HM190275              |
| HE572935/FRA/2010       | FRA     | 2010 | HE572935              |
| JQ946053/TW/2010        | TW      | 2010 | JQ946053              |
| MF596066/CHN/2010       | CHN     | 2010 | MF596066              |
| CF152047 FRA10          | FRA     | 2010 | HE572913              |
| CF194018 FRA10          | FRA     | 2010 | HE572937              |
| TH/CU84/A/2010          | THA     | 2010 | KX212342              |
| SHAPHC1253F/SH/CHN/2010 | CHN     | 2010 | JN316021              |
| CF147014 FRA10          | FRA     | 2010 | HE572909              |
| UK/V1/Ed/2010           | UK      | 2010 | KP129348              |
| CHN/HK456845/NOV2010    | CHN     | 2010 | MH049854              |
| JPN/2134/2010           | JPN     | 2010 | LC421636              |
| JPN/2182/2010           | JPN     | 2010 | LC421638              |
| TW/409/A/JUN2010        | TW      | 2010 | JQ946055              |
| SHAPHC1283F/SH/CHN/2010 | CHN     | 2010 | JN316023              |
| CF155023 FRA2010        | FRA     | 2010 | HE572915              |
| SHAPHC1232T/SH/CHN/2010 | CHN     | 2010 | JN316017              |

|                            |     |      |          |
|----------------------------|-----|------|----------|
| TH/CU83/A/2010             | THA | 2010 | KX212341 |
| HE572938/FRA/2010          | FRA | 2010 | HE572938 |
| JX154929/CHN/2010          | CHN | 2010 | JX154929 |
| GU59482-OCT2010            | SP  | 2010 | KC688834 |
| CA70062-NOV2010            | SP  | 2010 | KC688835 |
| MA69993-NOV2010            | SP  | 2010 | KC688836 |
| UK/V1/Ed/2011              | UK  | 2011 | KP144349 |
| 23-0215/osaka.JPN/2011     | JPN | 2011 | AB688679 |
| shizuoka-19/2011           | JPN | 2011 | AB649291 |
| shizuoka-9/2011            | JPN | 2011 | AB649287 |
| shizuoka-1/2011            | JPN | 2011 | AB649286 |
| 23-0214/osaka.JPN/2011     | JPN | 2011 | AB688677 |
| TH/CU137/OCT2011           | THA | 2011 | JX626314 |
| TW/1537/A/2011             | TW  | 2011 | JN582001 |
| SHAPHC3411/SH/CHN/11       | CHN | 2011 | AFV26058 |
| SHAPHC3468/SH/CHN/11       | CHN | 2011 | JX495149 |
| GU30838-JUN2011            | SP  | 2011 | KC688837 |
| VI46737-SEP2011            | SP  | 2011 | KC688838 |
| VI46774-SEP2011            | SP  | 2011 | KC688839 |
| VI46750-SEP2011            | SP  | 2011 | KC688840 |
| PA46098-SEP2011            | SP  | 2011 | KC688841 |
| VI55717-OCT2011            | SP  | 2011 | KC688842 |
| MA54125-NOV2011            | SP  | 2011 | KC688843 |
| MA54129-NOV2011            | SP  | 2011 | KC688844 |
| VI55713-NOV2011            | SP  | 2011 | KC688845 |
| MA56722-NOV2011            | SP  | 2011 | KC688846 |
| TH/CU/179/JUN2012          | THA | 2012 | JX556432 |
| TH/MUMT01/OCT2012          | THA | 2012 | KX372340 |
| CHN/HK418670/APR2012       | CHN | 2012 | MH049857 |
| CHN/SZ/JB141210046/JUN2012 | CHN | 2012 | MH321902 |
| UK/V1/Ed/2012              | UK  | 2012 | KP144350 |
| UK/V2/Ed/2012              | UK  | 2012 | KP129347 |
| CHN/SH/4368/2012           | CHN | 2012 | KJ541169 |
| KX212514/THA/2012          | THA | 2012 | KX212514 |
| KC207848/CHN/2012          | CHN | 2012 | KC207848 |
| MA14329-MAR2012            | SP  | 2012 | KC688847 |
| MA14335-MAR2012            | SP  | 2012 | KC688848 |
| GC25060-MAY2012            | SP  | 2012 | KC688849 |
| BA44008-MAY2012            | SP  | 2012 | KC688850 |
| V23992-JUN2012             | SP  | 2012 | KC688851 |
| MA29275-JUL2012            | SP  | 2012 | KC688852 |
| V38215-OCT2012             | SP  | 2012 | KC688853 |
| CA46827-NOV2012            | SP  | 2012 | KC688855 |
| BA44190-NOV2012            | SP  | 2012 | KC688856 |
| GU00153-DIC2012            | SP  | 2012 | KC688857 |
| UK/V7/Ed/2013              | UK  | 2013 | KP144342 |
| CHN/P115/2013              | CHN | 2013 | KP289367 |
| CHN/SZc173/2013            | CHN | 2013 | KF682362 |
| LC364117/JPN/2013          | JPN | 2013 | LC364117 |
| KJ865454/CHN/2013          | CHN | 2013 | KJ865454 |

|                           |     |      |          |
|---------------------------|-----|------|----------|
| KY424374/CHN/2014         | CHN | 2014 | KY424374 |
| UK/V1/Gla/2014            | UK  | 2014 | KP144343 |
| DE/G4/A/2014              | GER | 2014 | KX212508 |
| TH/CU1499/A/2014          | THA | 2014 | KX212503 |
| SE/116246/2014            | SWE | 2014 | KX212488 |
| TH/CU1555/A/2014          | THA | 2014 | KX212404 |
| DK/M22061/A/2014          | DEN | 2014 | KX212411 |
| DK/H36898/A/2014          | DEN | 2014 | KX212416 |
| CHN/M27-YN/2014           | CHN | 2014 | LC412058 |
| CHN/R109/YN/2014          | CHN | 2014 | KY211739 |
| KX212527/CHN/2014         | CHN | 2014 | KX212527 |
| DE/47066/2015             | GER | 2015 | MH472799 |
| KX212502/THA/2015         | THA | 2015 | KX212502 |
| UK/SCO-SW/2015            | UK  | 2015 | MH361015 |
| TH/CU1624/A/2015          | THA | 2015 | KX212394 |
| TH/CU1665/A/2015          | THA | 2015 | KX212388 |
| JPN/FS212/Fukuoka/2015    | JPN | 2015 | LC364161 |
| CHN/LW03R/Shandong/2015   | CHN | 2015 | KY126091 |
| CHN/WH15066/Shandong/2015 | CHN | 2015 | KY126092 |
| LC421572/JPN/2015         | JPN | 2015 | LC421572 |
| MH539784/IND/2015         | IND | 2015 | MH539784 |
| KU708609/CHN/2015         | CHN | 2015 | KU708609 |
| JPN/2091/2016             | JPN | 2016 | LC421576 |
| DE/47914/2016             | GER | 2016 | MH472790 |
| CHN/SDTA/282/2016         | CHN | 2016 | MH086214 |
| CHN/R94-YN/2016           | CHN | 2016 | LC412976 |
| JPN/FS601/Fukuoka/2016    | JPN | 2016 | LC364168 |
| MH539786/IND/2016         | IND | 2016 | MH539786 |
| MF596136/CHN/2016         | CHN | 2016 | MF596136 |
| IT/DG04/2017              | ITA | 2017 | MH371303 |
| JPN/FS365/Fukuoka/2017    | JPN | 2017 | LC364193 |
| DE/43421/2017             | GER | 2017 | MH472798 |
| JPN/FS82/Fukuoka/2017     | JPN | 2017 | LC364172 |
| CHN/147/2017              | CHN | 2017 | MG385798 |
| CHN/91/2017               | CHN | 2017 | MG385831 |
| CHN/JN414/2018            | CHN | 2018 | MK357085 |
| CHN/A282-KM/2018          | CHN | 2018 | LC516767 |
| CHN/S3083/2019            | CHN | 2019 | MN329130 |
| CHN/B16/Shenyang/2019     | CHN | 2019 | MK307022 |
